# Supplementary material for: Effects of Radio-Taiso on Health-related Quality of Life in Older Adults With Frailty: a Randomized Controlled Trial
Source: PubMed Central journal article supplement (PMC11405370; doi:10.2188/jea.je20230317), 2024-10-05
Supplement: je-34-467-s001.pdf [file je-34-467-s001.pdf]

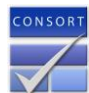

## CONSORT 2010 checklist of information to include when reporting a randomised trial\*

| Section/Topic             | Item |                                                                                                                         | Reported<br>on page No        |
|---------------------------|------|-------------------------------------------------------------------------------------------------------------------------|-------------------------------|
|                           | No   | Checklist item                                                                                                          |                               |
| <b>Title and abstract</b> |      |                                                                                                                         |                               |
|                           | 1a   | Identification as a randomised trial in the title                                                                       | 1                             |
|                           | 1b   | Structured summary of trial design, methods, results, and conclusions (for specific guidance see CONSORT for abstracts) | 4–5                           |
| <b>Introduction</b>       |      |                                                                                                                         |                               |
| Background and objectives | 2a   | Scientific background and explanation of rationale                                                                      | 6-8                           |
|                           | 2b   | Specific objectives or hypotheses                                                                                       | 8                             |
| <b>Method</b>             |      |                                                                                                                         |                               |
| Trial design              | 3a   | Description of trial design (such as parallel, factorial) including allocation ratio                                    | 8                             |
|                           | 3b   | Important changes to methods after trial commencement (such as eligibility criteria), with reasons                      | N.A.                          |
| Participants              | 4a   | Eligibility criteria for participants                                                                                   | 9 and<br>Additional file<br>2 |
|                           | 4b   | Settings and locations where the data were collected                                                                    | 8–9                           |
| Interventions             | 5    | The interventions for each group with sufficient details to allow replication, including how and when they were         | 10–12                         |

|                          |     |                                                                                                                                                                                             |                               |
|--------------------------|-----|---------------------------------------------------------------------------------------------------------------------------------------------------------------------------------------------|-------------------------------|
|                          |     | actually administered                                                                                                                                                                       |                               |
| Outcomes                 | 6a  | Completely defined pre-specified primary and secondary outcome measures, including how and when they were assessed                                                                          | 12–14<br>Additional file<br>3 |
|                          | 6b  | Any changes to trial outcomes after the trial commenced, with reasons                                                                                                                       | N.A.                          |
| Sample size              | 7a  | How sample size was determined                                                                                                                                                              | 14                            |
|                          | 7b  | When applicable, explanation of any interim analyses and stopping guidelines                                                                                                                | N.A.                          |
| Randomisation:           |     |                                                                                                                                                                                             |                               |
| Sequence                 | 8a  | Method used to generate the random allocation sequence                                                                                                                                      | 10                            |
| generation               | 8b  | Type of randomisation; details of any restriction (such as blocking and block size)                                                                                                         | 10                            |
| Allocation               | 9   | Mechanism used to implement the random allocation sequence (such as sequentially numbered containers), describing any steps taken to conceal the sequence until interventions were assigned | 10                            |
| concealment<br>mechanism |     |                                                                                                                                                                                             |                               |
| Implementation           | 10  | Who generated the random allocation sequence, who enrolled participants, and who assigned participants to interventions                                                                     | 10                            |
| Blinding                 | 11a | If done, who was blinded after assignment to interventions (for example, participants, care providers, those assessing outcomes) and how                                                    | 10                            |
|                          | 11b | If relevant, description of the similarity of interventions                                                                                                                                 | 10                            |
| Statistical methods      | 12a | Statistical methods used to compare groups for primary and secondary outcomes                                                                                                               | 14–15                         |

|                                                      |     |                                                                                                                                                   |                            |
|------------------------------------------------------|-----|---------------------------------------------------------------------------------------------------------------------------------------------------|----------------------------|
|                                                      | 12b | Methods for additional analyses, such as subgroup analyses and adjusted analyses                                                                  | 15–16                      |
| <b>Results</b>                                       |     |                                                                                                                                                   |                            |
| Participant flow (a diagram is strongly recommended) | 13a | For each group, the numbers of participants who were randomly assigned, received intended treatment, and were analysed for the primary outcome    | 16                         |
|                                                      | 13b | For each group, losses and exclusions after randomisation, together with reasons                                                                  | Figure 3                   |
| Recruitment                                          | 14a | Dates defining the periods of recruitment and follow-up                                                                                           | 9                          |
|                                                      | 14b | Why the trial ended or was stopped                                                                                                                | N.A.                       |
| Baseline data                                        | 15  | A table showing baseline demographic and clinical characteristics for each group                                                                  | 16–17<br>Table 1           |
| Numbers analysed                                     | 16  | For each group, number of participants (denominator) included in each analysis and whether the analysis was by original assigned groups           | Figure 3<br>17             |
| Outcomes and estimation                              | 17a | For each primary and secondary outcome, results for each group, and the estimated effect size and its precision (such as 95% confidence interval) | 18–19<br>Tables 2–3        |
|                                                      | 17b | For binary outcomes, presentation of both absolute and relative effect sizes is recommended                                                       | N.A.                       |
| Ancillary analyses                                   | 18  | Results of any other analyses performed, including subgroup analyses and adjusted analyses, distinguishing pre-specified from exploratory         | 19<br>Additional files 5–7 |
| Harms                                                | 19  | All important harms or unintended effects in each group (for specific guidance see CONSORT for harms)                                             | 18                         |

## Discussion

|                          |    |                                                                                                                  |       |
|--------------------------|----|------------------------------------------------------------------------------------------------------------------|-------|
| Limitations              | 20 | Trial limitations, addressing sources of potential bias, imprecision, and, if relevant, multiplicity of analyses | 23    |
| Generalisability         | 21 | Generalisability (external validity, applicability) of the trial findings                                        | 22–23 |
| Interpretation           | 22 | Interpretation consistent with results, balancing benefits and harms, and considering other relevant evidence    | 20–23 |
| <b>Other information</b> |    |                                                                                                                  |       |
| Registration             | 23 | Registration number and name of trial registry                                                                   | 5     |
| Protocol                 | 24 | Where the full trial protocol can be accessed, if available                                                      | 9     |
| Funding                  | 25 | Sources of funding and other support (such as supply of drugs), role of funders                                  | 25    |

\*We strongly recommend reading this statement in conjunction with the CONSORT 2010 Explanation and Elaboration for important clarifications on all the items. If relevant, we also recommend reading CONSORT extensions for cluster randomised trials, non-inferiority and equivalence trials, non-pharmacological treatments, herbal interventions, and pragmatic trials. Additional extensions are forthcoming: for those and for up to date references relevant to this checklist, see [www.consort-statement.org](http://www.consort-statement.org).

**eMaterial 2.** The exclusion criteria of this study

---

- 1 Participants who had known inability to participate in at least one of the baseline  
and follow-up assessments
  - 2 Those diagnosed with dementia or on anti-dementia medication
  - 3 Those who cannot eat, toilet, dress, move, or bath independently
  - 4 Those who were prohibited from exercising by a family physician (except for  
light-intensity exercise)
  - 5 Those with unstable or severe medical condition that could preclude study  
participation
  - 6 Those who had angina, myocardial infarction, or cardiac surgery within the past  
three months
  - 7 Those who practiced Radio-Taiso for more than 1 day/week in the past month
  - 8 Those who participated in specific rehabilitation programs
  - 9 Those who cannot walk independently for more than 10 min
  - 10 Those who participated or planned to participate in other clinical trials
  - 11 Those who had no television at their home
  - 12 Those who could not communicate in Japanese
  - 13 Those judged as ineligible by the principal investigator and trial physicians
  - 14 Those who did not provide consent to participate
-

**eMaterial 3.** Detailed measurement for secondary outcomes, adherence, and adverse events

### **Physical parameters**

The frailty phenotype was assessed by summing the five limitations (slowness, weakness, exhaustion, inactivity, and weight loss) using the revised Japanese version of the Cardiovascular Health Study criteria.<sup>1,2</sup>

The Senior Fitness Test Battery assesses six physical fitness domains: agility/dynamic balance, lower and upper body strength, flexibility, and aerobic endurance.<sup>3</sup> Agility/dynamic balance was assessed by standing up from a chair, walking around a cone 8 feet away as fast as possible, and measuring the time it took to sit down again (8-foot up-and-go test). Lower body muscle strength was assessed by counting the number of times the participants stood up from a chair for 30 seconds (chair stand test). Upper body muscle strength was assessed by counting the number of times the participants flexed and extended their elbows while holding a dumbbell in their dominant hands for 30 seconds (arm curl test). Lower body flexibility was assessed by measuring the distance between the toes of the dominant leg and the fingertips of both hands while sitting on a chair and bending the upper body (chair sit-and-reach test).

Upper-body flexibility was assessed by measuring the distance between the middle fingers when any hand approached diagonally above backward and diagonally below backward (back scratch test). Aerobic endurance was assessed by counting the time the right leg was raised while marching in place for 2 minutes (2-min step-in-place test).

### **Psychological parameters**

Attention and executive function were assessed by measuring the time required for each task in Parts A and B of the Trail Making Test.<sup>4</sup> Exercise self-efficacy was assessed using the Home Exercise Barriers Self-Efficacy Scale.<sup>5</sup> The scale ranges from 6–30 points, with higher scores indicating greater confidence in exercising at home.

Depressive symptoms were assessed using the short version of the Geriatric Depression Scale.<sup>6</sup> This scale is rated from 0–15, with higher scores indicating a more depressive mood.

### **Biochemical parameters**

Exercise-induced brain-derived neurotrophic factors may explain improvements in mental health by mediating neuronal differentiation, growth, synaptogenesis, and plasticity.<sup>7</sup> Participants were instructed to fast for at least 2 hours, and their blood

samples were collected from the anterior elbow vein. Plasma brain-derived neurotrophic factor concentrations were assessed using a commercially available two-site sandwich enzyme-linked immunosorbent assay kit (R&D Systems, Minneapolis, MN, USA).

### **Sociological parameters**

Social networks were assessed using the Japanese version of the Lubben Social Network Scale.<sup>8</sup> This scale is rated on a 0–30 point scale, with higher scores indicating a more extensive social network.

### **Lifestyle parameters**

A brief-type self-administered dietary history questionnaire assessed daily energy intake by recalling the average dietary habits over the past month and recording the frequency of each food item consumed.<sup>9, 10</sup> Daily step counts were assessed using a 3-axis accelerometer (Active style Pro HJA-750C; Omron Healthcare, Tokyo, Japan) to indicate daily physical activity level.<sup>11, 12</sup> Participants were instructed to wear the device on their hip during all daily activities except for water activities from waking to bedtime for 7 days from the baseline and after the follow-up assessments. Daily step counts were calculated for samples in which valid records were collected for at least 3 days.<sup>13</sup> Sleep



quality was assessed using the Japanese version of the Pittsburgh Sleep Quality Index,<sup>14,</sup>  
<sup>15</sup> and the total scores on this scale range from 0 to 21, with higher scores indicating  
poorer daily sleep quality.

### **Adherence**

The retention percentage during the intervention period (percentage of participants who  
completed the follow-up assessments), practice percentage in participants' homes  
(number of days that the Radio-Taiso was practiced at least once per day/84 days), and  
the total number of practices during the intervention period were assessed.

### **Adverse events**

Once every 2 weeks, research assistants recorded whether participants experienced an  
adverse event, defined as *"any undesirable/unintended sign, symptom, or disease  
occurring during the intervention, regardless of causality,"* via telephone or face-to-face  
interviews.<sup>16</sup> The total number of adverse events occurring during the intervention  
period was recorded, and trial physicians evaluated the severity and causality of the  
individual adverse events and their association with the Radio-Taiso. The number of  
adverse events and incidence of all adverse events were assessed.

## REFERENCES

1. Fried LP, Tangen CM, Walston J, et al. Frailty in older adults: evidence for a phenotype. *J Gerontol A Biol Sci Med Sci.* 2001;56:M146-56.
2. Satake S, Arai H. The revised Japanese version of the Cardiovascular Health Study criteria (revised J-CHS criteria). *Geriatr Gerontol Int.* 2020;20:992-3.
3. Rikli RE, Jones CJ. Development and validation of a functional fitness test for community-residing older adults. *J Aging Phys Act.* 1999;7:129-61.
4. Army Individual Test Battery. Washington, DC: War Department. Adjutant General's Office; 1944.
5. Arita N, Takenaka K, Shimazaki T. Development of a home-exercise barrier self-efficacy scale for elderly people requiring support and care. *J Jpn Phys Ther Assoc.* 2014;41:338-46.
6. Yatomi N. The factor structure and item characteristic of the GDS (Geriatric Depression Scale) short version in a Japanese elderly sample. *Japanese Journal of Gerontology.* 1994;16:29-36.
7. Knaepen K, Goekint M, Heyman EM, Meeusen R. Neuroplasticity - exercise-induced response of peripheral brain-derived neurotrophic factor: a systematic review of experimental studies in human subjects. *Sports Med.* 2010;40:765-

801.

8. Kurimoto A, Awata S, Ohkubo T, et al. [Reliability and validity of the Japanese version of the abbreviated Lubben Social Network Scale]. *Nihon Ronen Igakkai Zasshi*. 2011;48:149-57.
9. Kobayashi S, Murakami K, Sasaki S, et al. Comparison of relative validity of food group intakes estimated by comprehensive and brief-type self-administered diet history questionnaires against 16 d dietary records in Japanese adults. *Public Health Nutr*. 2011;14:1200-11.
10. Kobayashi S, Honda S, Murakami K, et al. Both comprehensive and brief self-administered diet history questionnaires satisfactorily rank nutrient intakes in Japanese adults. *J Epidemiol*. 2012;22:151-9.
11. Oshima Y, Kawaguchi K, Tanaka S, et al. Classifying household and locomotive activities using a triaxial accelerometer. *Gait Posture*. 2010;31:370-4.
12. Ohkawara K, Oshima Y, Hikiyama Y, Ishikawa-Takata K, Tabata I, Tanaka S. Real-time estimation of daily physical activity intensity by a triaxial accelerometer and a gravity-removal classification algorithm. *Br J Nutr*. 2011;105:1681-91.
13. Troiano RP, Berrigan D, Dodd KW, Mâsse LC, Tilert T, McDowell M. Physical

activity in the United States measured by accelerometer. *Med Sci Sports Exerc.* 2008;40:181-8.

14. Doi Y, Minowa M, Uchiyama M, et al. Psychometric assessment of subjective sleep quality using the Japanese version of the Pittsburgh Sleep Quality Index (PSQI-J) in psychiatric disordered and control subjects. *Psychiatry Res.* 2000;97:165-72.
15. Doi Y, Minowa M, Okawa M, Uchiyama M. Development of the Japanese version of the Pittsburgh Sleep Quality Index. *Jpn J Psychiatry Treat.* 1998;13:755-63 (in Japanese).
16. Osuka Y, Kojima N, Sugie M, et al. Effects of a home-based Radio-Taiso exercise programme on health-related quality of life in older adults with frailty: protocol for an assessor-blind randomised controlled trial. *BMJ Open.* 2022;12:e063201.

**eTable 1.** Consistency of the home-based Radio-Taiso's effectiveness between the full analysis and multiple imputed sets

|                                       | Full analysis set |                               | Multiple imputed set |                               |
|---------------------------------------|-------------------|-------------------------------|----------------------|-------------------------------|
|                                       | n                 | Group difference <sup>a</sup> | n                    | Group difference <sup>a</sup> |
| <b>Health-related quality of life</b> |                   |                               |                      |                               |
| <i>MCS, point</i>                     | 209               | -0.4 (-2.1 to 1.3)            | 220                  | -0.3 (-2.1 to 1.4)            |
| <i>PCS, point</i>                     | 209               | 1.7 (-0.3 to 3.7)             | 220                  | 1.6 (-0.3 to 3.6)             |
| <i>RCS, point</i>                     | 209               | -0.2 (-2.9 to 2.5)            | 220                  | -0.1 (-2.8 to 2.5)            |
| <i>Physical function, point</i>       | 209               | 0.7 (-0.9 to 2.4)             | 220                  | 0.7 (-0.9 to 2.4)             |
| <i>Physical role, point</i>           | 209               | 0.6 (-1.7 to 2.8)             | 220                  | 0.5 (-1.7 to 2.7)             |
| <i>Body pain, point</i>               | 209               | 0.4 (-1.9 to 2.7)             | 220                  | 0.2 (-2.0 to 2.5)             |
| <i>General health, point</i>          | 209               | 0.5 (-1.3 to 2.2)             | 220                  | 0.3 (-1.5 to 2.0)             |
| <i>Vitality, point</i>                | 209               | -0.2 (-2.1 to 1.7)            | 220                  | -0.2 (-2.2 to 1.7)            |
| <i>Social function, point</i>         | 209               | -0.5 (-2.9 to 1.9)            | 220                  | -0.6 (-3.2 to 1.9)            |
| <i>Emotional role, point</i>          | 209               | -0.8 (-3.0 to 1.4)            | 220                  | -0.8 (-3.0 to 1.3)            |
| <i>Mental health, point</i>           | 209               | -0.8 (-2.5 to 0.9)            | 220                  | -0.6 (-2.3 to 1.0)            |
| <b>Physical parameters</b>            |                   |                               |                      |                               |
| <i>Frailty phenotype, point</i>       | 200               | 0.2 (0 to 0.4)                | 220                  | 0.2 (-0.1 to 0.4)             |
| <i>8-foot up-and-go, s</i>            | 201               | 0.3 (0.1 to 0.6)*             | 220                  | 0.3 (0.1 to 0.6)*             |
| <i>Chair stand, times/30s</i>         | 200               | -0.7 (-1.5 to 0.0)            | 220                  | -0.7 (-1.5 to 0.1)            |

|                                      |     |                      |     |                      |
|--------------------------------------|-----|----------------------|-----|----------------------|
| <i>Arm curl, times/30s</i>           | 200 | -0.6 (-1.5 to 0.2)   | 220 | -0.6 (-1.4 to 0.2)   |
| <i>Chair sit-and-reach, cm</i>       | 199 | -0.6 (-2.2 to 1.0)   | 220 | -0.6 (-2.2 to 1.1)   |
| <i>Back scratch, cm</i>              | 200 | -0.5 (-1.8 to 0.8)   | 220 | -0.6 (-1.9 to 0.8)   |
| <i>2-min step-in-place, times</i>    | 188 | -3.2 (-6.1 to -0.2)* | 220 | -3.1 (-6.2 to 0.0)*  |
| <b>Psychological parameters</b>      |     |                      |     |                      |
| <i>TMT part A, s</i>                 | 202 | 4.4 (0 to 8.9)       | 220 | 4.4 (-0.2 to 8.9)    |
| <i>TMT part B, s</i>                 | 202 | 6.6 (-3.7 to 17.0)   | 220 | 6.4 (-4.1 to 16.9)   |
| <i>HEBS, score</i>                   | 209 | -1.4 (-2.6 to -0.1)* | 220 | -1.4 (-2.6 to -0.1)* |
| <i>GDS, score</i>                    | 209 | 0.0 (-0.5 to 0.5)    | 220 | 0.0 (-0.5 to 0.5)    |
| <b>Biochemical parameters</b>        |     |                      |     |                      |
| <i>BDNF, µg/mL</i>                   | 202 | 1.0 (-0.4 to 2.4)    | 220 | 0.9 (-0.5 to 2.4)    |
| <b>Sociological parameters</b>       |     |                      |     |                      |
| <i>LSNS-6, score</i>                 | 208 | -0.4 (-1.3 to 0.6)   | 220 | -0.3 (-1.2 to 0.6)   |
| <b>Habitual lifestyle parameters</b> |     |                      |     |                      |
| <i>Energy intake, kcal/day</i>       | 209 | -29 (-144 to 86)     | 220 | -23 (-139 to 93)     |
| <i>Step counts, steps/day</i>        | 201 | 5 (-290 to 300)      | 220 | -41 (-328 to 245)    |
| <i>PSQI, score</i>                   | 207 | -0.3 (-0.8 to 0.2)   | 220 | -0.3 (-0.8 to 0.2)   |

---

BDNF, brain-derived neurotrophic factor; GDS, Geriatric Depression Scale; HEBS, Home-Exercise

Barrier Self-Efficacy Scale; LSNS-6, Lubben Social Network Scale-6; MCS, mental component summary;

PCS, physical component summary; PSQI Pittsburgh Sleep Quality Index; RCS, role/social component

summary; TMT, trail making test.

<sup>a</sup>Group differences (the control–intervention groups) in the change of each outcome are show as mean differences (95% confidence intervals) adjusted for allocation stratification factors and baseline values.

\* $P < 0.05$ .

**eTable 2.** Effect modification of the home-based Radio-Taiso stratified by sex

|                                       | Male |                                | Female |                                   | <i>P</i> values for<br>effect modification |
|---------------------------------------|------|--------------------------------|--------|-----------------------------------|--------------------------------------------|
|                                       | n    | Group differences <sup>a</sup> | n      | Group<br>differences <sup>a</sup> |                                            |
| <b>Health-related quality of life</b> |      |                                |        |                                   |                                            |
| <i>MCS, point</i>                     | 63   | -1.2 (-5.0 to 2.7)             | 146    | -0.5 (-2.4 to 1.4)                | 0.797                                      |
| <i>PCS, point</i>                     | 63   | 2.8 (-1.1 to 6.6)              | 146    | 1.3 (-1.1 to 3.6)                 | 0.442                                      |
| <i>RCS, point</i>                     | 63   | -0.3 (-4.6 to 4.1)             | 146    | -0.3 (-3.7 to -3.1)               | 0.794                                      |
| <i>Physical function, point</i>       | 63   | 2.6 (-0.5 to 5.6)              | 146    | -0.1 (-2.1 to 2.0)                | 0.148                                      |
| <i>Physical role, point</i>           | 63   | 0.8 (-2.7 to 4.2)              | 146    | 0.5 (-2.4 to 3.4)                 | 0.895                                      |
| <i>Body pain, point</i>               | 63   | 1.0 (-3.3 to 5.4)              | 146    | -0.1 (-2.7 to 2.6)                | 0.530                                      |
| <i>General health, point</i>          | 63   | -0.3 (-4.0 to 3.3)             | 146    | 0.6 (-1.4 to 2.6)                 | 0.846                                      |
| <i>Vitality, point</i>                | 63   | -0.5 (-4.6 to 3.6)             | 146    | -0.3 (-2.5 to 1.9)                | 0.956                                      |
| <i>Social function, point</i>         | 63   | -1.0 (-4.3 to 2.4)             | 146    | -0.3 (-3.5 to 2.8)                | 0.796                                      |
| <i>Emotional role, point</i>          | 63   | -0.6 (-4.0 to 2.9)             | 146    | -0.9 (-3.7 to 1.9)                | 0.813                                      |
| <i>Mental health, point</i>           | 63   | -0.4 (-3.7 to 3.0)             | 146    | -1.4 (-3.4 to 0.6)                | 0.286                                      |
| <b>Physical parameters</b>            |      |                                |        |                                   |                                            |
| <i>Frailty phenotype, point</i>       | 59   | 0.1 (-0.3 to 0.4)              | 141    | 0.2 (0.0 to 0.5)                  | 0.582                                      |
| <i>8-foot up-and-go, s</i>            | 58   | 0.7 (0.0 to 1.3)               | 143    | 0.2 (-0.1 to 0.4)                 | 0.110                                      |
| <i>Chair stand, times/30s</i>         | 57   | -2.4 (-4.2 to -0.6)            | 143    | -0.1 (-0.8 to 0.7)                | 0.006                                      |



|                                   |    |                      |     |                    |       |
|-----------------------------------|----|----------------------|-----|--------------------|-------|
| <i>Arm curl, times/30s</i>        | 58 | -1.2 (-2.8 to 0.5)   | 142 | -0.4 (-1.4 to 0.6) | 0.454 |
| <i>Chair sit-and-reach, cm</i>    | 57 | -4.4 (-7.6 to -1.2)  | 142 | 0.9 (-0.9 to 2.7)  | 0.004 |
| <i>Back scratch, cm</i>           | 58 | 0.1 (-2.3 to 2.5)    | 142 | -0.7 (-2.2 to 0.9) | 0.700 |
| <i>2-min step-in-place, times</i> | 53 | -8.8 (-15.2 to -2.3) | 135 | -1.0 (-4.3 to 2.3) | 0.020 |

### **Psychological parameters**

|                      |    |                     |     |                    |       |
|----------------------|----|---------------------|-----|--------------------|-------|
| <i>TMT part A, s</i> | 59 | 4.8 (-4.0 to 13.6)  | 143 | 4.6 (-0.6 to 9.9)  | 0.959 |
| <i>TMT part B, s</i> | 59 | 14.2 (-5.7 to 34.1) | 143 | 3.5 (-8.8 to 15.9) | 0.369 |
| <i>HEBS, score</i>   | 63 | -1.3 (-3.9 to 1.2)  | 146 | -1.5 (-2.9 to 0.0) | 0.794 |
| <i>GDS, score</i>    | 63 | -0.3 (-1.1 to 0.5)  | 146 | 0.1 (-0.5 to 0.8)  | 0.666 |

### **Biochemical parameters**

|                    |    |                   |     |                   |       |
|--------------------|----|-------------------|-----|-------------------|-------|
| <i>BDNF, µg/mL</i> | 59 | 0.2 (-1.9 to 2.5) | 143 | 1.4 (-0.4 to 3.1) | 0.440 |
|--------------------|----|-------------------|-----|-------------------|-------|

### **Sociological parameters**

|                      |    |                    |     |                    |       |
|----------------------|----|--------------------|-----|--------------------|-------|
| <i>LSNS-6, score</i> | 63 | -0.3 (-2.5 to 1.8) | 145 | -0.3 (-1.3 to 0.7) | 0.970 |
|----------------------|----|--------------------|-----|--------------------|-------|

### **Habitual lifestyle**

#### **parameters**

|                                |    |                    |     |                    |       |
|--------------------------------|----|--------------------|-----|--------------------|-------|
| <i>Energy intake, kcal/day</i> | 63 | -36 (-253 to 182)  | 146 | -19 (-155 to 118)  | 0.923 |
| <i>Step counts, steps/day</i>  | 58 | 404 (-69 to 878)   | 143 | -94 (-461 to 273)  | 0.259 |
| <i>PSQI, score</i>             | 63 | -0.1 (-1.2 to 0.9) | 144 | -0.3 (-0.9 to 0.3) | 0.893 |

---

BDNF, brain-derived neurotrophic factor; GDS, Geriatric Depression Scale; HEBS, Home-Exercise

Barrier Self-Efficacy Scale; LSNS-6, Lubben Social Network Scale-6; MCS, mental component summary;

PCS, physical component summary; PSQI Pittsburgh Sleep Quality Index; RCS, role/social component

summary; TMT, trail making test.

<sup>a</sup>Group differences (the control–intervention groups) in the change of each outcome are show as mean differences (95% confidence intervals) adjusted for allocation stratification factors and baseline values.

Effect modification was tested for group  $\times$  sex interactions.

**eTable 3.** Effect modification of the home-based Radio-Taiso stratified by age category

|                                       | <75 years |                                | ≥75 years |                                | <i>P</i> values for |
|---------------------------------------|-----------|--------------------------------|-----------|--------------------------------|---------------------|
|                                       | n         | Group differences <sup>a</sup> | n         | Group differences <sup>a</sup> | effect modification |
| <b>Health-related quality of life</b> |           |                                |           |                                |                     |
| <i>MCS, point</i>                     | 56        | -0.3 (-3.5 to 2.8)             | 153       | -0.4 (-2.5 to 1.6)             | 0.885               |
| <i>PCS, point</i>                     | 56        | 2.7 (-1.2 to 6.6)              | 153       | 1.3 (-1.1 to 3.6)              | 0.476               |
| <i>RCS, point</i>                     | 56        | -1.0 (-5.0 to 3.0)             | 153       | 0.0 (-3.5 to 3.4)              | 0.854               |
| <i>Physical function, point</i>       | 56        | 1.4 (-1.3 to 4.0)              | 153       | 0.5 (-1.6 to 2.6)              | 0.618               |
| <i>Physical role, point</i>           | 56        | 0.6 (-2.6 to 3.9)              | 153       | 0.6 (-2.3 to 3.4)              | 0.995               |
| <i>Body pain, point</i>               | 56        | 0.3 (-4.1 to 4.7)              | 153       | 0.3 (-2.4 to 2.9)              | 0.870               |
| <i>General health, point</i>          | 56        | 0.8 (-3.0 to 4.6)              | 153       | 0.3 (-1.7 to 2.3)              | 0.726               |
| <i>Vitality, point</i>                | 56        | -0.6 (-4.4 to 3.3)             | 153       | -0.1 (-2.3 to 2.2)             | 0.860               |
| <i>Social function, point</i>         | 56        | 0.2 (-3.8 to 4.2)              | 153       | -0.9 (-3.9 to 2.2)             | 0.649               |
| <i>Emotional role, point</i>          | 56        | -1.8 (-4.6 to 1.0)             | 153       | -0.4 (-3.2 to 2.4)             | 0.563               |
| <i>Mental health, point</i>           | 56        | -1.4 (-4.0 to 1.2)             | 153       | -0.5 (-2.6 to 1.6)             | 0.699               |
| <b>Physical parameters</b>            |           |                                |           |                                |                     |
| <i>Frailty phenotype, point</i>       | 53        | 0.1 (-0.3 to 0.5)              | 147       | 0.2 (0.0 to 0.5)               | 0.646               |
| <i>8-foot up-and-go, s</i>            | 54        | 0.1 (-0.1 to 0.3)              | 147       | 0.4 (0.1 to 0.7)               | 0.418               |
| <i>Chair stand, times/30s</i>         | 54        | -0.4 (-1.7 to 0.9)             | 146       | -0.9 (-1.8 to 0.1)             | 0.582               |

|                                      |    |                     |     |                     |       |
|--------------------------------------|----|---------------------|-----|---------------------|-------|
| <i>Arm curl, times/30s</i>           | 54 | 0.5 (-0.8 to 1.9)   | 146 | -1.1 (-2.1 to 0.0)  | 0.097 |
| <i>Chair sit-and-reach, cm</i>       | 53 | 0.6 (-2.3 to 3.5)   | 146 | -1.0 (-2.9 to 0.9)  | 0.372 |
| <i>Back scratch, cm</i>              | 54 | 0.3 (-2.4 to 2.9)   | 146 | -0.8 (-2.3 to 0.8)  | 0.528 |
| <i>2-min step-in-place, times</i>    | 52 | 3.3 (-0.7 to 7.3)   | 136 | -5.7 (-9.5 to -1.9) | 0.007 |
| <b>Psychological parameters</b>      |    |                     |     |                     |       |
| <i>TMT part A, s</i>                 | 54 | 4.0 (-1.3 to 9.3)   | 148 | 4.6 (-1.3 to 10.4)  | 0.939 |
| <i>TMT part B, s</i>                 | 54 | 11.5 (-3.8 to 26.8) | 148 | 4.7 (-8.2 to 17.6)  | 0.531 |
| <i>HEBS, score</i>                   | 56 | -2.3 (-5.0 to 0.5)  | 153 | -1.1 (-2.5 to 0.3)  | 0.551 |
| <i>GDS, score</i>                    | 56 | -0.2 (-1.1 to 0.7)  | 153 | 0.1 (-0.5 to 0.7)   | 0.573 |
| <b>Biochemical parameters</b>        |    |                     |     |                     |       |
| <i>BDNF, µg/mL</i>                   | 54 | 1.8 (-1.4 to 5.1)   | 148 | 0.7 (-0.9 to 2.2)   | 0.464 |
| <b>Sociological parameters</b>       |    |                     |     |                     |       |
| <i>LSNS-6, score</i>                 | 55 | -0.6 (-2.2 to 1.0)  | 153 | -0.2 (-1.4 to 0.9)  | 0.649 |
| <b>Habitual lifestyle parameters</b> |    |                     |     |                     |       |
| <i>Energy intake, kcal/day</i>       | 56 | -12.9 (-258 to 232) | 153 | -23 (-154 to 108)   | 0.977 |
| <i>Step counts, steps/day</i>        | 54 | 511 (-206 to 1229)  | 147 | -152 (-450 to 147)  | 0.082 |
| <i>PSQI, score</i>                   | 56 | -0.6 (-1.5 to 0.4)  | 151 | -0.2 (-0.8 to 0.4)  | 0.539 |

---

BDNF, brain-derived neurotrophic factor; GDS, Geriatric Depression Scale; HEBS, Home-Exercise

Barrier Self-Efficacy Scale; LSNS-6, Lubben Social Network Scale-6; MCS, mental component summary;

PCS, physical component summary; PSQI Pittsburgh Sleep Quality Index; RCS, role/social component

summary; TMT, trail making test.

<sup>a</sup>Group differences (the control–intervention groups) in the change of each outcome are show as mean differences (95% confidence intervals) adjusted for allocation stratification factors and baseline values.

Effect modification was tested for group × sex interactions.

**eTable 4.** Effect modification of the home-based Radio-Taiso stratified by severity of frailty

|                                       | Pre-frailty |                                | Frailty |                                   | <i>P</i> values for<br>effect modification |
|---------------------------------------|-------------|--------------------------------|---------|-----------------------------------|--------------------------------------------|
|                                       | n           | Group differences <sup>a</sup> | n       | Group<br>differences <sup>a</sup> |                                            |
| <b>Health-related quality of life</b> |             |                                |         |                                   |                                            |
| <i>MCS, point</i>                     | 189         | -0.7 (-2.5 to 1.1)             | 20      | 2.9 (-3.4 to 9.2)                 | 0.214                                      |
| <i>PCS, point</i>                     | 189         | 1.1 (-1.0 to 3.1)              | 20      | 8.4 (1.6 to 15.2)                 | 0.026                                      |
| <i>RCS, point</i>                     | 189         | 0.1 (-2.6 to 2.8)              | 20      | -4.7 (-17.0 to 7.7)               | 0.263                                      |
| <i>Physical function, point</i>       | 189         | 0.4 (-1.3 to 2.1)              | 20      | 4.5 (-3.6 to 12.7)                | 0.171                                      |
| <i>Physical role, point</i>           | 189         | 0.4 (-1.8 to 2.7)              | 20      | 2.0 (-7.8 to 11.7)                | 0.699                                      |
| <i>Body pain, point</i>               | 189         | -0.5 (-2.9 to 1.9)             | 20      | 9.0 (3.1 to 15.0)                 | 0.013                                      |
| <i>General health, point</i>          | 189         | 0.1 (-1.8 to 1.9)              | 20      | 4.0 (-1.4 to 9.5)                 | 0.185                                      |
| <i>Vitality, point</i>                | 189         | -0.6 (-2.6 to 1.5)             | 20      | 3.0 (-3.5 to 9.5)                 | 0.262                                      |
| <i>Social function, point</i>         | 189         | -0.6 (-3.0 to 1.9)             | 20      | 1.3 (-9.2 to 11.8)                | 0.953                                      |
| <i>Emotional role, point</i>          | 189         | -0.8 (-3.0 to 1.4)             | 20      | -2.1 (-13.0 to 8.7)               | 0.830                                      |
| <i>Mental health, point</i>           | 189         | -0.9 (-2.6 to 0.9)             | 20      | 0.0 (-7.5 to 7.6)                 | 0.722                                      |
| <b>Physical parameters</b>            |             |                                |         |                                   |                                            |
| <i>Frailty phenotype, point</i>       | 182         | 0.3 (0.0 to 0.5)               | 18      | -0.6 (-1.4 to 0.2)                | 0.011                                      |
| <i>8-foot up-and-go, s</i>            | 184         | 0.3 (0.1 to 0.5)               | 17      | -0.3 (-2.7 to 2.2)                | 0.775                                      |
| <i>Chair stand, times/30s</i>         | 183         | -1.0 (-1.8 to -0.2)            | 17      | 2.3 (-0.3 to 4.9)                 | 0.015                                      |

|                                      |     |                     |    |                      |       |
|--------------------------------------|-----|---------------------|----|----------------------|-------|
| <i>Arm curl, times/30s</i>           | 182 | -0.8 (-1.7 to 0.1)  | 18 | 0.9 (-2.8 to 4.6)    | 0.272 |
| <i>Chair sit-and-reach, cm</i>       | 181 | -1.1 (-2.7 to 0.5)  | 18 | 4.6 (-2.9 to 12.1)   | 0.048 |
| <i>Back scratch, cm</i>              | 182 | -0.8 (-2.2 to 0.6)  | 18 | 2.5 (-2.4 to 7.5)    | 0.186 |
| <i>2-min step-in-place, times</i>    | 173 | -2.9 (-6.0 to 0.1)  | 15 | -4.6 (-21.0 to 11.7) | 0.483 |
| <b>Psychological parameters</b>      |     |                     |    |                      |       |
| <i>TMT part A, s</i>                 | 184 | 2.9 (-1.5 to 7.2)   | 18 | 23.4 (-2.2 to 48.9)  | 0.023 |
| <i>TMT part B, s</i>                 | 184 | 7.4 (-3.5 to 18.4)  | 18 | -5.2 (-29.4 to 19.0) | 0.696 |
| <i>HEBS, score</i>                   | 189 | -2.0 (-3.2 to -0.7) | 20 | 3.8 (-1.4 to 9.1)    | 0.006 |
| <i>GDS, score</i>                    | 189 | 0.1 (-0.5 to 0.6)   | 20 | -0.1 (-1.8 to 1.6)   | 0.693 |
| <b>Biochemical parameters</b>        |     |                     |    |                      |       |
| <i>BDNF, µg/mL</i>                   | 184 | 0.9 (-0.6 to 2.4)   | 18 | 2.5 (-1.9 to 6.9)    | 0.492 |
| <b>Sociological parameters</b>       |     |                     |    |                      |       |
| <i>LSNS-6, score</i>                 | 188 | -0.1 (-1.0 to 0.9)  | 20 | -3.0 (-6.7 to 0.8)   | 0.057 |
| <b>Habitual lifestyle parameters</b> |     |                     |    |                      |       |
| <i>Energy intake, kcal/day</i>       | 189 | -40 (-162 to 82)    | 20 | 112 (-250 to 473)    | 0.519 |
| <i>Step counts, steps/day</i>        | 184 | -57 (-368 to 255)   | 17 | 541 (-87 to 1169)    | 0.193 |
| <i>PSQI, score</i>                   | 187 | -0.2 (-0.8 to 0.3)  | 20 | -0.4 (-1.6 to 0.9)   | 0.605 |

---

BDNF, brain-derived neurotrophic factor; GDS, Geriatric Depression Scale; HEBS, Home-Exercise

Barrier Self-Efficacy Scale; LSNS-6, Lubben Social Network Scale-6; MCS, mental component summary; PCS, physical component summary; PSQI Pittsburgh Sleep Quality Index; RCS, role/social component summary; TMT, trail making test.

<sup>a</sup>Group differences (the control–intervention groups) in the change of each outcome are show as mean differences (95% confidence intervals) adjusted for allocation stratification factors and baseline values.

Effect modification was tested for group × sex interactions.
